# Supplementary material for: Use of haplotypes to identify regions harbouring lethal recessive variants in pigs
Source: PubMed Central journal article supplement (PMC5512953; doi:10.1186/s12711-017-0332-3), 2017-07-14
Supplement: 12711_2017_332_MOESM2_ESM.pdf [file 12711_2017_332_MOESM2_ESM.pdf]

# Linkage disequilibrium $r^2$

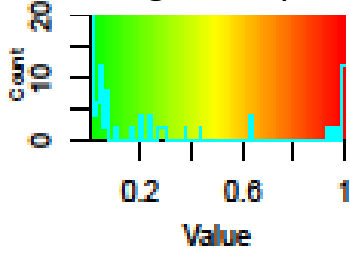

Mb Position

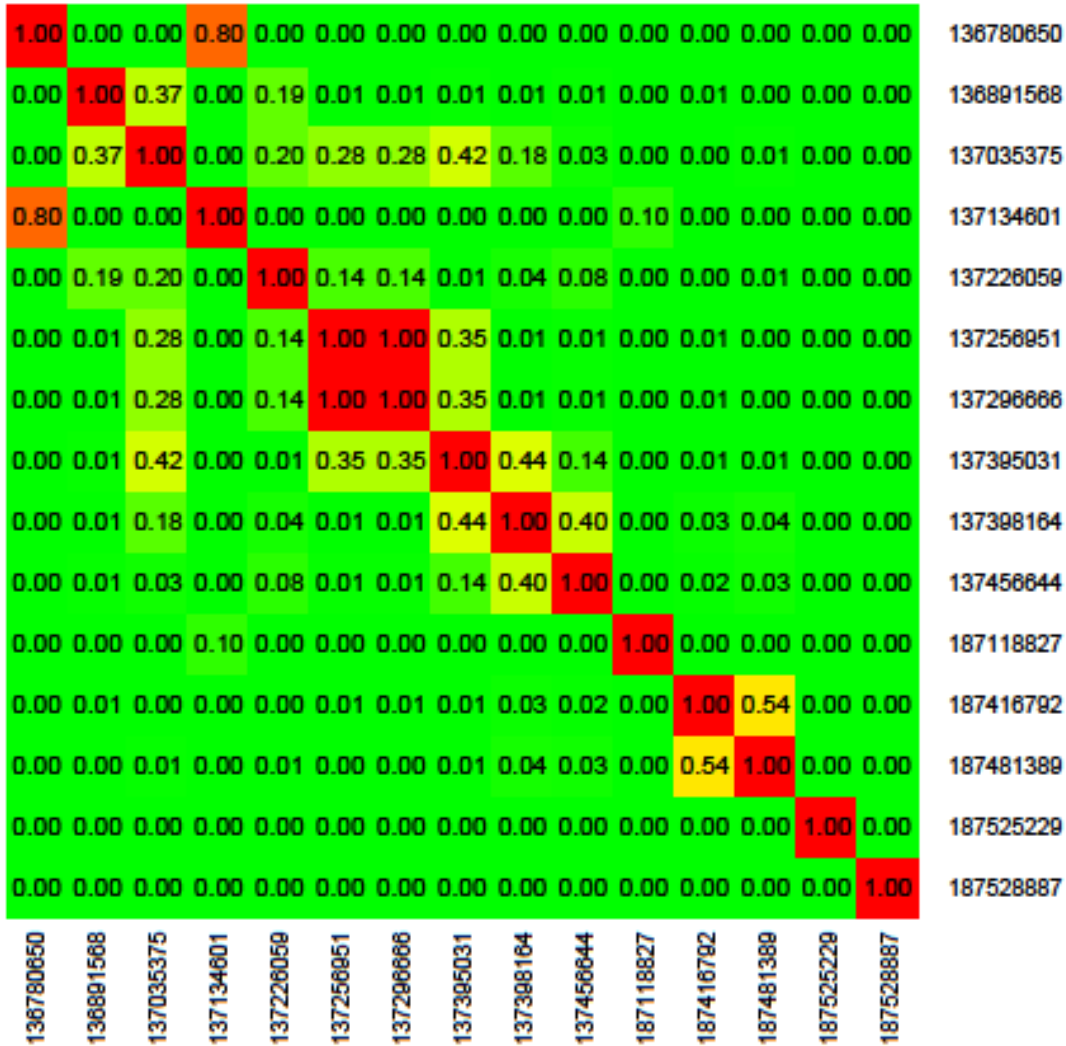

Haplotype in Region 1.1

Haplotype in Region 1.2
